# Supplementary material for: Intercomparison of Middle Atmospheric Meteorological Analyses for the Northern Hemisphere Winter 2009–2010
Source: Copernicus journal article supplement (doi:10.5194/acp-2021-224), 2021-03-24
Supplement: Supplementary file 1 [file acp-2021-224-supplement.pdf]

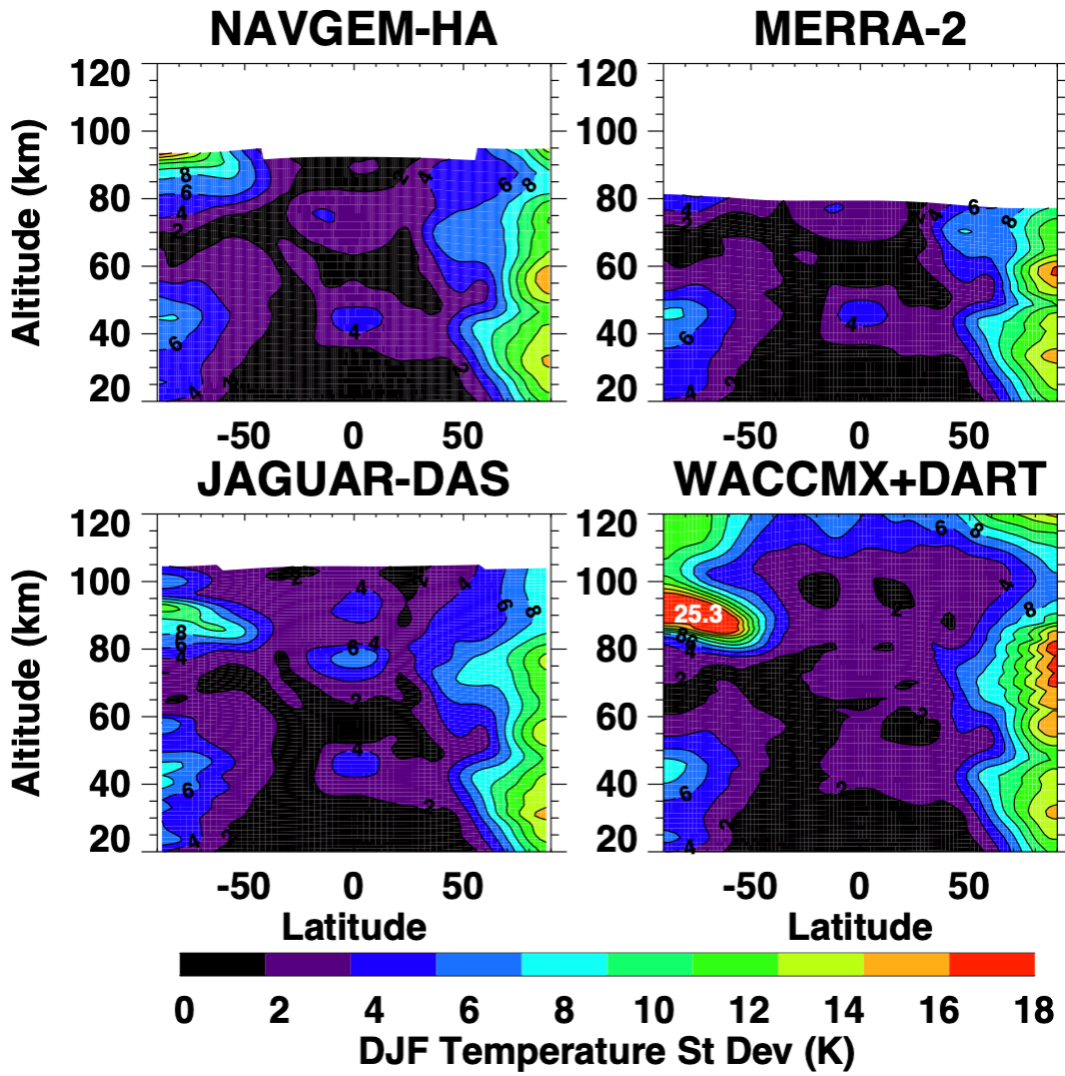

Figure S1. Latitude-altitude cross sections of the standard deviation in DJF mean temperatures from NAVGEM-HA, MERRA2, JAGUAR-DAS, and WACCMX+DART. Contour interval is 2 K.

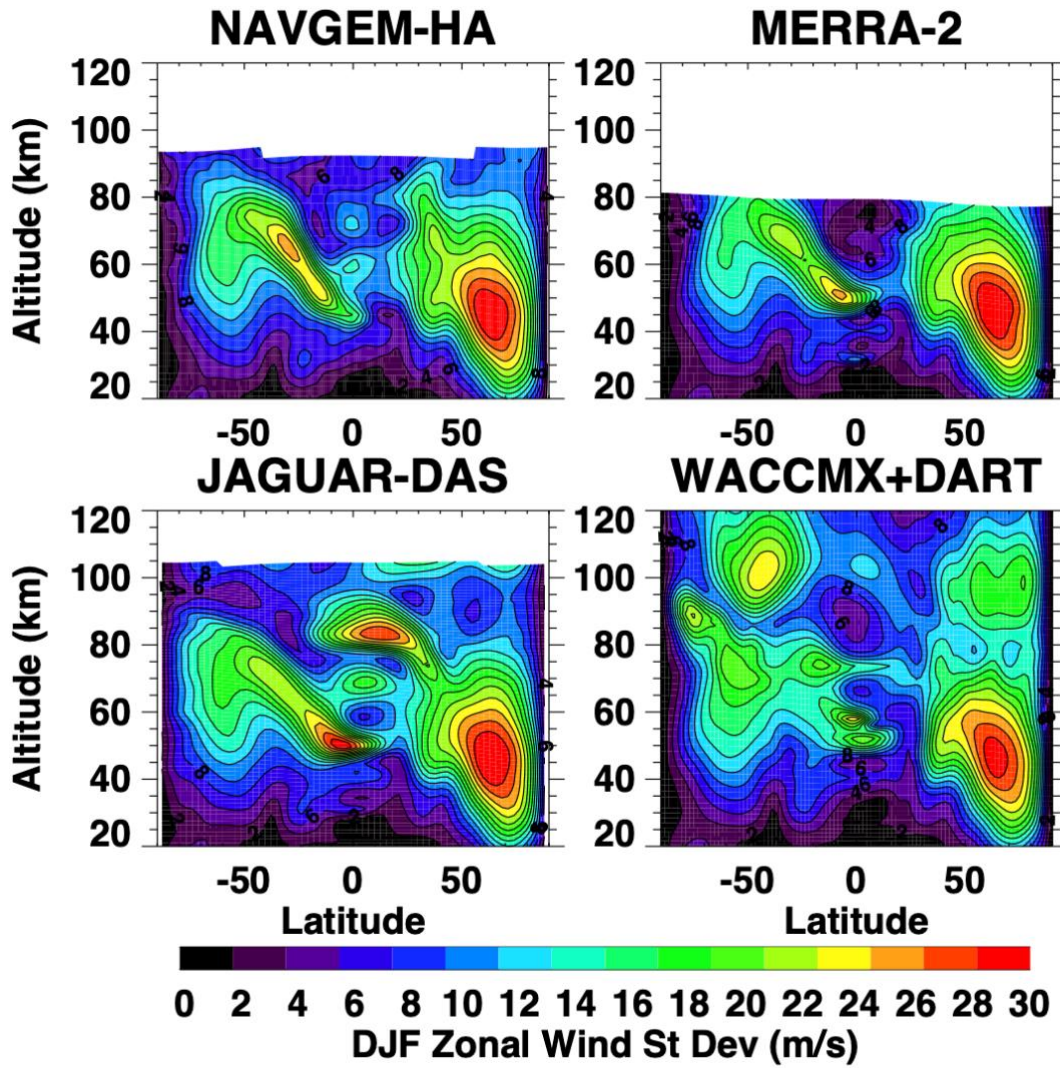

5

Figure S2. Latitude-altitude cross sections of the standard deviation in DJF mean zonal wind from NAVGEM-HA, MERRA2, JAGUAR-DAS, and WACCMX+DART. Contour interval is  $2 \text{ m s}^{-1}$ .
